# Supplementary material for: Targeting PELP1 Attenuates Angiogenesis and Enhances Chemotherapy Efficiency in Colorectal Cancer
Source: Cancers (Basel). 2022 Jan 13;14(2):383. doi: 10.3390/cancers14020383 (PMC8773490; doi:10.3390/cancers14020383)
Supplement: Supplementary file 1 [file cancers-14-00383-s001.zip › cancers-1518636-supplementary.pdf]

## Supplementary Material

### Supplementary materials and methods

#### *Gene set enrichment analyses*

To determine the function of PELP1 in CRC, the dataset GSE29623 and GSE65979 were obtained from the Gene Expression Omnibus and analyzed by GSEA software(<http://www.broadinstitute.org/gsea/index.jsp>).The gene sets with normalized using an enrichment score of  $>1$ ,  $p<0.05$ , which were regarded as significantly enriched gene sets.

#### *Cell lines and Cell Culture*

The CRC cells including HCT116, HT29, RKO, SW620 and COLO205, human immortalized normal colon epithelium (FHC) and HUVECs were obtained from the tumor cell bank of the Chinese Academy of Medical Science. All CRC cells and FHC cells were cultured in DMEM supplemented with 10% FBS (Cat. No.10099-141, Gibco). HUVECs were cultured in basal ECM (Cat. No.1001, Sciencell) supplemented with 5% FBS and endothelial cell growth supplements. The cells were maintained at 37 °C in a humidified atmosphere of 5% CO<sub>2</sub>.

#### *siRNA transfection*

Human VEGFA siRNA and its control siRNA were purchased from Ribobio (Cat. No. CRH5078, Cohesion). The CRC cells were transfected with VEGFA siRNA and control siRNA using Lipofectamine 3000 (Cat. No. L3000015, Invitrogen) according to the manufacturer's instructions. The transfection efficiency was confirmed by the RT-qPCR.

### *Generation of stable Cell Lines*

HCT116 and HT29 cells were transfected with either PELP1 overexpression plasmid (kindly provided by Dr. Ratna Vadlamudi, the University of Texas Health Science Center at San Antonio, San Antonio) and shPELP1 plasmid (Cat. No.P24031, MiaoLingBio) using Lipofectamine 3000. Stable transfectants were selected with Geneticin (Cat. No.A1720, Sigma Aldrich) or Puromycin (Cat. No.ST551, Beyotime) for 2 weeks. Resistant colonies were pooled and subcultured in the selection medium.

### *Immunoblot analysis*

The cultured cells or xenograft tissues were harvested and lysed by RIPA buffer containing protease inhibitors and phosphatase inhibitors. Total protein was separated by SDS-PAGE and transferred onto PVDF membranes. The membranes were blocked in 5% nonfat milk at room temperature for 1h, followed by incubation with a primary antibody against PELP1 (Cat. No.IHC-00013, Bethyl), VEGFA (Cat. No.66828-1-Ig, Proteintech), phospho-STAT3 (Cat. No.9145, CST), STAT3 (Cat. No. 4904, CST), GAPDH (Cat. No.2118S, CST) in 5% nonfat milk at 4°C overnight. After washing with TBST, the membranes were probed with secondary antibodies for 1h at room temperature. The immunoblot signals were exposed to X-ray film (Eastman Kodak).

### *RT-qPCR*

Total RNA was isolated from the CRC cells by TRIzol (Cat. No.Trizol, Invitrogen). 2000 ng RNA was reverse transcribed by High Capacity cDNA Reverse Transcription Kit (Cat.

No.4368814,Thermo Fisher). Then equal amount of cDNA was amplified using SYBR Green PCR amplification kit (Cat. No.4913850001,Sigma-Aldrich) with the CFX Connect Real-Time PCR Detection System (Bio-Rad, USA).GAPDH was used as an internal control. The results were normalized to GAPDH expression. Primers used are listed below.

|                | Forward                        | Reverse                         |
|----------------|--------------------------------|---------------------------------|
| <i>PELP1</i>   | <i>TTGGCTTCGGAGCATT CAG</i>    | <i>CCCGAGGGGAAATAGGTCAT AC</i>  |
| <i>VEGFA</i>   | <i>GTATTCAGCCAAACGACCATC</i>   | <i>CTGGTTCGCTTTCTCTTTTCG</i>    |
| <i>VEGFB</i>   | <i>GAGATGTCCCTGGAAGAACACA</i>  | <i>GAGTGGGATGGGTGATGTC AG</i>   |
| <i>VEGFC</i>   | <i>ATGTGTGTCCGTCTACAGATGT</i>  | <i>GGAAGTGTGATTGGCAAAA CTGA</i> |
| <i>VEGFD</i>   | <i>TCCCATCGGTCCACTAGGTTT</i>   | <i>AGGGCTGCACTGAGTTCTT TG</i>   |
| <i>PGF</i>     | <i>GAACGGCTCGTCAGAGGTG</i>     | <i>ACAGTGCAGATTCTCATCG CC</i>   |
| <i>PDGF-BB</i> | <i>CTCGATCCGCTCCTTTGATGA</i>   | <i>CGTTGGTGCGGTCTATGAG</i>      |
| <i>MMP2</i>    | <i>TACAGGATCATTGGCTACACACC</i> | <i>GGTCACATCGCTCCAGACT</i>      |
| <i>CXCL9</i>   | <i>CCAGTAGTGAGAAAGGGTCGC</i>   | <i>AGGGCTTGGGGCAAATTGT T</i>    |
| <i>THBS1</i>   | <i>AGACTCCGCATCGCAAAGG</i>     | <i>TCACCACGTTGTTGTCAAG GG</i>   |
| <i>PLGF</i>    | <i>TTTTGCCAAGGAGTGCTAAAGA</i>  | <i>AACCCTCTGCACCCAGTTTT C</i>   |
| <i>Ang2</i>    | <i>GCTGCTGGTTTATTACTGAAGAA</i> | <i>TCAGGTGGACTGGGATGTT TAG</i>  |
| <i>EGF</i>     | <i>CTTGGGAGCCTGAGCAGAAA</i>    | <i>TGCACAAGTGTGACTGGAG G</i>    |

#### *Histomorphometry staining*

To evaluate the hypoxia of tumor tissue, 60mg/kg PIMO (Cat. No.HP-500mgHypoxyprobe) was injected into tumor-bearing mice through the tail vein 90 minutes before tumor harvest, then the sections of tumor were immunostained with

anti-PIMO antibody (Cat. No.HP11-100kit, Hypoxyprobe) according to the Manufacturer's instructions. All images were captured using Bio-Tek/Cytation5 system and analyzed by Image J software (version 1.46; National Institutes of Health).

#### *ELISA assay*

The concentration of VEGFA and PDGF-BB in each CM were quantified by human VEGF ELISA kit (Cat. No.RK00023, Abclonal) and PDGF-BB ELISA kit(Cat. No. RK04112, Abclonal)accordingto the manufacturer'sprotocol.

#### *Cell counting kit-8 assay*

Cell proliferation was assessed by Cell Counting Kit-8 (CCK-8) (Cat. No.C0039, Beyotime). The transfected cells were seeded in 96-well plates at a density of  $1 \times 10^5$  cells/well, and then added 10  $\mu$ l of CCK-8 into the medium. Each plates were measured at 450 nm with a microplate reader (Bio-Tek/Cytation5 system) every 24 hours.

#### *Animal experiment*

5-week-old female nude mice were purchased from Beijing Vital River Laboratory. HCT116-shCtrl, HCT116-shPELP1 cells ( $5 \times 10^6$ ) were suspended at a 1:1 ratio in 200  $\mu$ l PBS were injected subcutaneously into right flank of nude mice in different group respectively.To investigate whether PELP1 knockdown enhance the efficacy of chemotherapy by improve tumor vascular function in CRC, from 10th day on, we intraperitoneally injected 2.5 mg/kg of cisplatin (Cat. No. A8321, Apexbio) dissolved in PBS or PBS into the mice of different groups every other day. On the last day of treatment, nude mice were injected with 10.0 mg/kg

cisplatin and the tumor growth was monitored for 30 days. The tumor size was measured every 5 days using a slide caliper and tumor volume was calculated by the following formula:  $\text{volume} = 0.5 \times \text{length} \times \text{width}^2$ . At the end of the experiment, the mice were sacrificed and the tumors were dissected and weighed. Then the tumors were split for high performance liquid chromatography (HPLC), paraffin block, and protein extraction. All animal experiments were done according to an Institution Animal Care and Use Committee-approved protocol.

#### *Measure the concentration of cisplatin in tumor tissue*

Excess blood from the tumor tissue was wiped off, and cisplatin was separated from the tissue. The concentration was measured by HPLC (Agilent® Technologies, Santa Clara, CA, USA) on a COSMOSIL C18 column (250 mm × 4.5 mm, 5 μm) (Shimadzu, Tokyo, Japan). Agilent ChemStation software was used in this experiment.

#### *Statistical analyses*

GraphPad Prism 5.0 (La Jolla, CA, USA) was used to analyze the all statistical data we have obtained. Student's t-test was used to find the differences between groups. The correlation between PELP1 with CD31, CD34 and VEGFA expression of CRC patients was analyzed by Pearson's correlation test. All experiments were performed in triplicate, and  $p < 0.05$  was considered statistically significant.

## Supplementary figures and legends

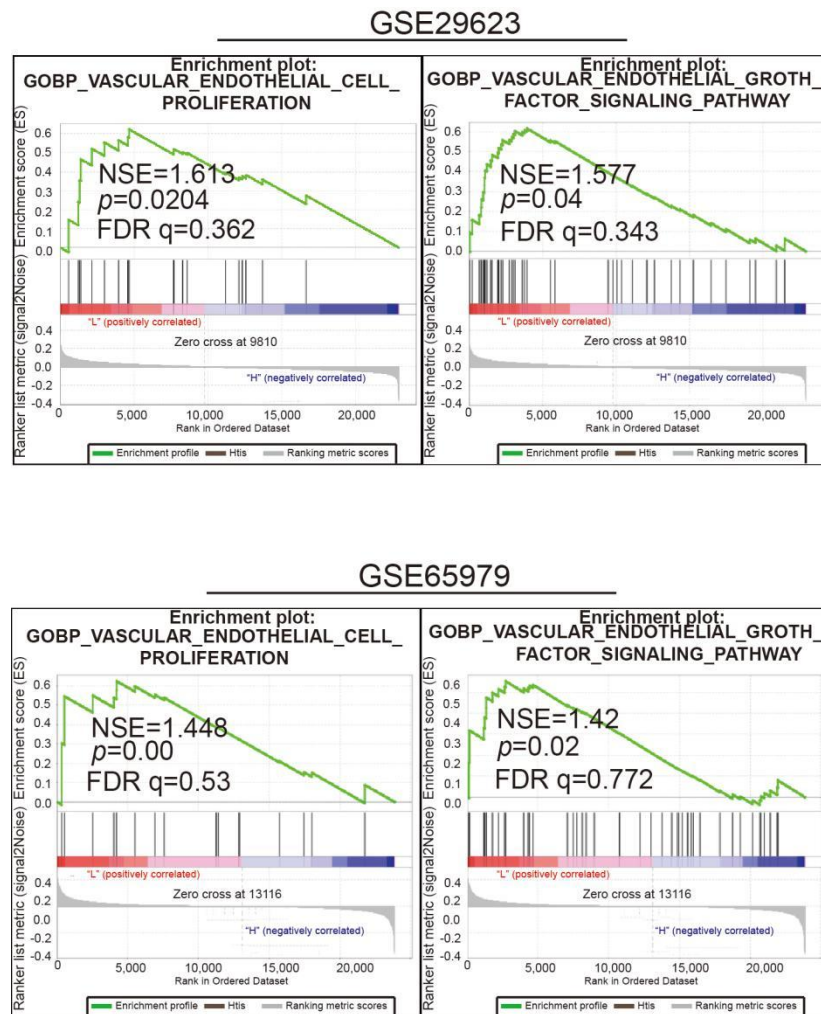

Figure S1. PELP1 is positively correlated with angiogenesis in CRC. GSEA of enrichment of GOBP\_VASCULAR\_ENDOTHELIAL\_CELL\_PROLIFERATION and GOBP\_VASCULAR\_ENDOTHELIAL\_GROWTH\_FACTOR\_SIGNALING\_PATHWAY in high expression versus low expression of PELP1 in GSE29623 and GSE65979 dataset. FDR, false-discovery rate q value. NES, normalized enrichment score.

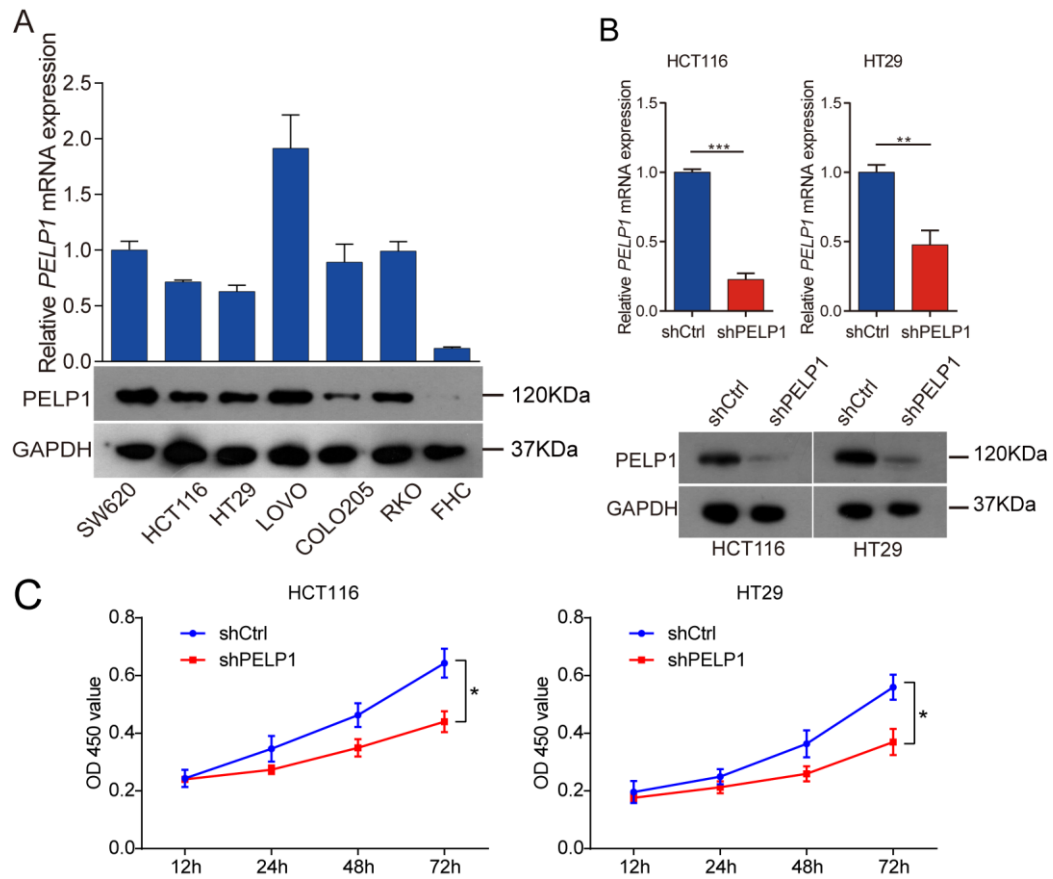

Figure S2. PELP1 is highly expressed in CRC cells. (A) RT-qPCR (upper) and immunoblot (lower) analysis of PELP1 in CRC cell lines and immortalized colonic epithelium (FHC). GAPDH was used as an internal control. (B) RT-qPCR (upper) and immunoblot (lower) of PELP1 expression in HCT116 and HT29 cells transfected with either control shRNA (shCtrl) or shRNA against PELP1 (shPELP1). GAPDH was used as an internal control. (C) CCK8 assays for HCT116 and HT29 cells transfected with either control shRNA or shRNA against PELP1. Data are shown as the means of three independent experiments or representative data. Error bars indicate SD. \* $p < 0.05$ , \*\* $p < 0.01$ , \*\*\* $p < 0.001$  by Student's t-test.

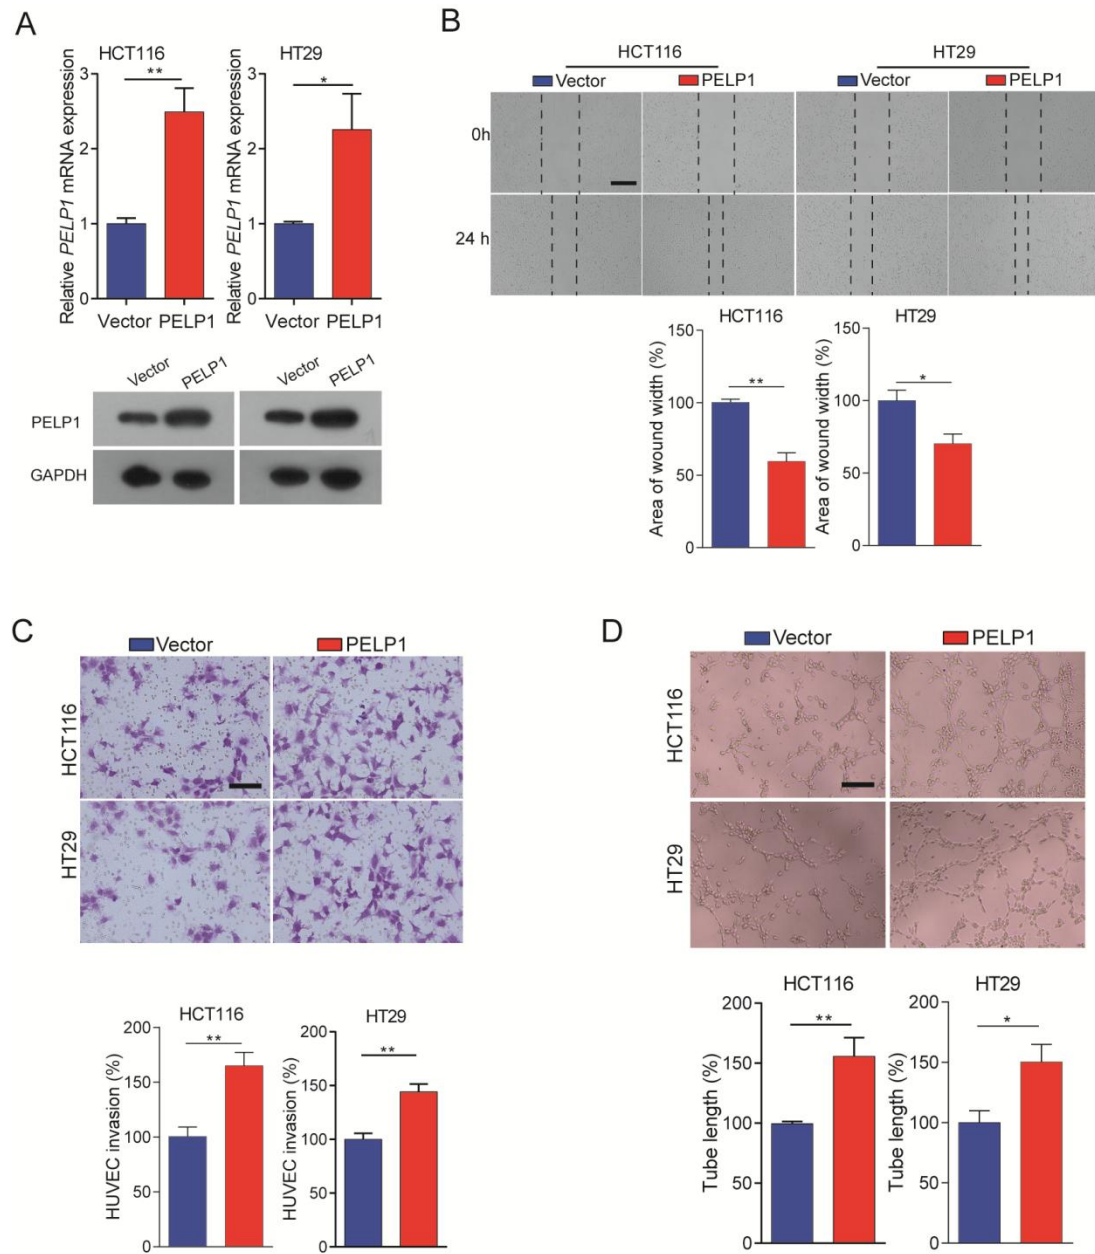

Figure S3. Overexpression of PELP1 enhances angiogenesis in vitro. (A) RT-qPCR (upper panel) and immunoblot (lower panel) analysis of PELP1 in PELP1 overexpression cells. GAPDH was used as an internal control. (B) Representative images of wound healing in HUVECs treated with CM from PELP1 CRC cells (upper panel). Scale bar: 200  $\mu$ m. Histograms with the fold change in wound closure formed by the indicated cells (lower panel). (C) Representative images of cell invasion in HUVECs treated with CM from PELP1 CRC cells (upper panel). Scale bar: 200  $\mu$ m. Histograms with the fold change in the number of

invaded cells formed by the indicated cells (lower panel). **(D)** Representative images of tube formation in HUVECs treated with CM from PELP1 CRC cells (upper panel). Scale bar: 200  $\mu\text{m}$ . Histograms with the fold change in the length of tube-like formation formed by the indicated cells (lower panel). Data are shown as the means of three independent experiments or representative data. Error bars indicate SD. \* $p < 0.05$ , \*\* $p < 0.01$ , \*\*\* $p < 0.001$  by Student's t-test.

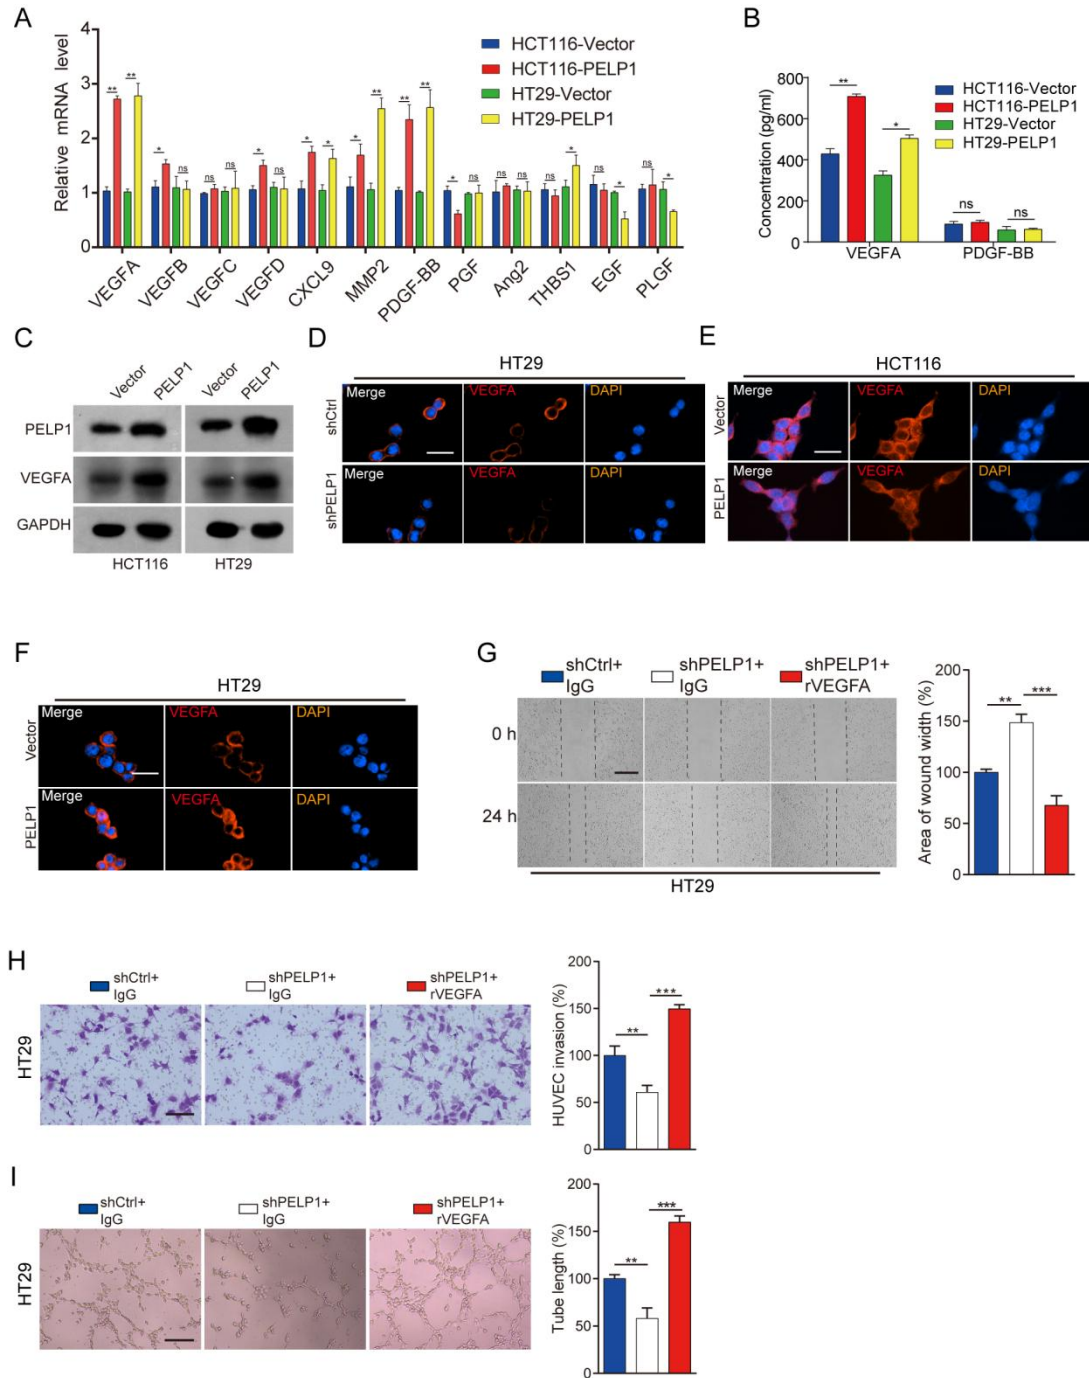

Figure S4. VEGFA is a critical key for PELP1 to promote angiogenesis in CRC. (A) The mRNA levels of the 12 angiogenesis-related genes in PELP1-overexpressing cells. GAPDH was used as an internal control. (B) ELISA analysis of VEGFA and PDGF-BB expression in PELP1-overexpressing CRC cells. (C) Immunoblot analysis of PELP1 and VEGFA expressions in PELP1-overexpressing CRC cells. GAPDH was used as an internal control. (D)

Representative images of immunofluorescence for VEGFA in HT29-shCtrlCRC cells or HT29-shPELP1CRC cells. Scale bar: 30  $\mu$ m. (E, F) Representative images of immunofluorescence for VEGFA in PELP1-overexpressing CRC cells. Scale bar: 30  $\mu$ m. (G) Representative images of wound healing in HUVECs treated with CM from HT29-shCtrl CRC cells or HT29-shPELP1 CRC cells added with or without recombinant VEGFA (rVEGFA) and IgG (left panel). Scale bar: 200  $\mu$ m. Histograms with the fold change in wound closure formed by the indicated cells (right panel). (H) Representative images of cells migration in HUVECs treated with CM from HT29-shCtrl CRC cells or HT29-shPELP1 CRC cells added with or without rVEGFA and IgG (left panel). Scale bar: 200  $\mu$ m. Histograms with the fold change in the number of invasion cells formed by the indicated cells (right panel). (I) Representative images of tube formation in HUVECs treated with CM from HT29-shCtrl CRC cells or HT29-shPELP1 CRC cells added with or without rVEGFA and IgG (left panel). Scale bar: 200  $\mu$ m. Histograms with the fold change in the length of tube-like formation formed by the indicated cells (right panel). Data are shown as the means of three independent experiments or representative data. Error bars indicate SD. n.s.: no significance,  $*p < 0.05$ ,  $**p < 0.01$ ,  $***p < 0.001$  by Student's t-test.

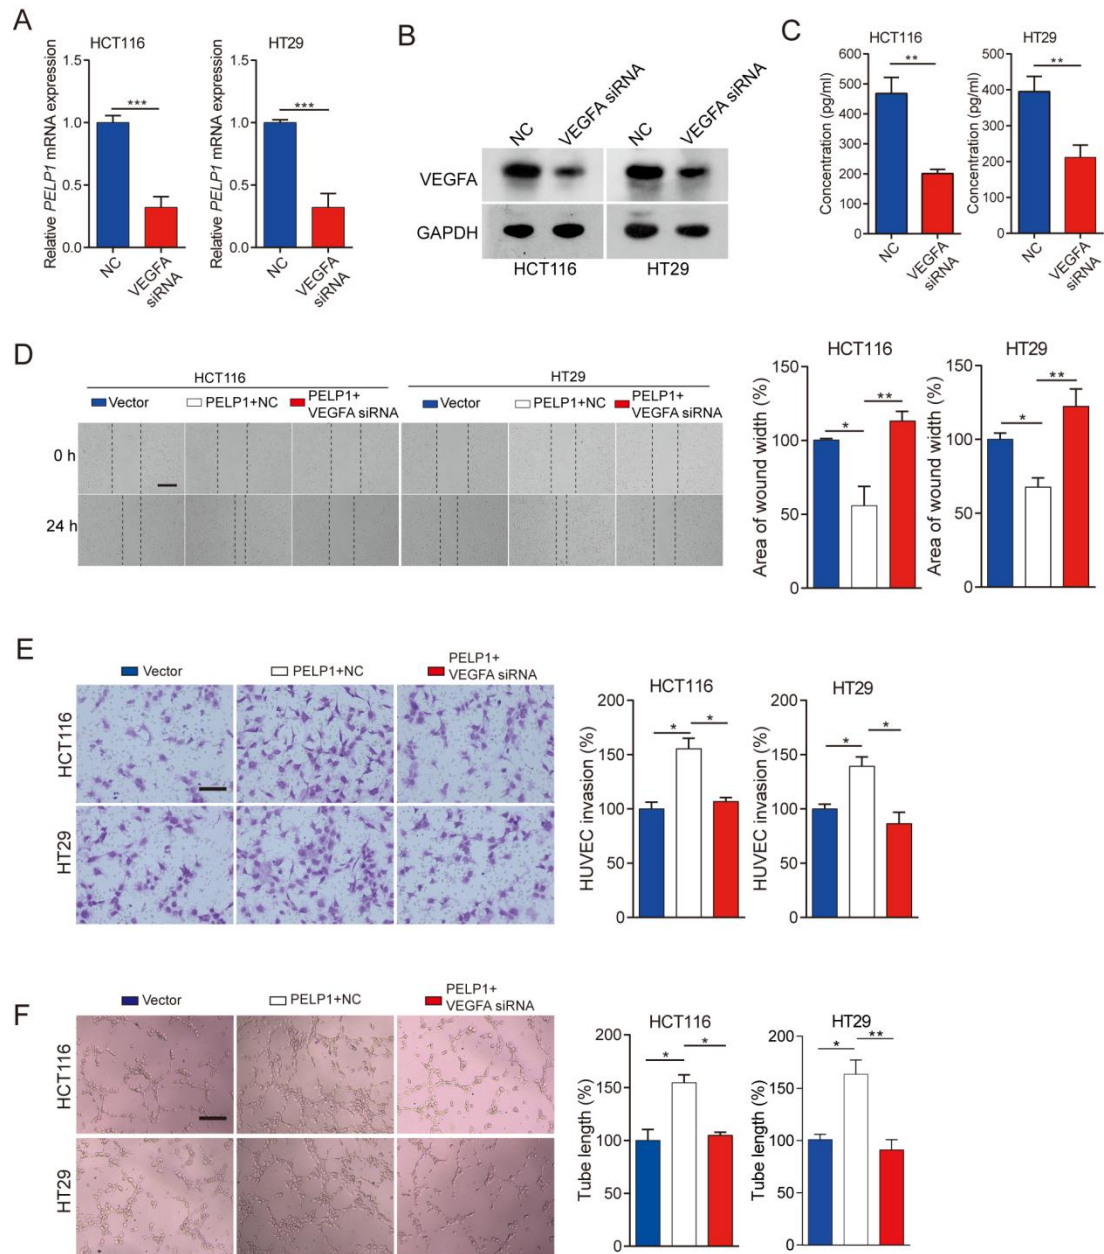

Figure S5. Downregulation of VEGFA inhibits PELP1-mediated angiogenesis. (A-C) RT-qPCR (A), immunoblot (B) and ELISA (C) of PELP1 expression in PELP1-overexpressing CRC cells transfected with siRNA negative control (NC) or VEGFA siRNA. (D) Representative images of wound healing in HUVECs treated with CM from PELP1-overexpressing CRC cells transfected with siRNA negative control (NC) or VEGFA siRNA (left panel). Scale bar: 200  $\mu$ m. Histograms with the fold change in wound closure formed by the indicated cells (right panel). (E) Representative images of cell migration in HUVECs treated with CM from

PELP1-overexpressing CRC cells transfected with siRNA negative control (NC) or VEGFA siRNA (left panel). Scale bar: 200  $\mu$ m. Histograms with the fold change in the number of migrated cells formed by the indicated cells (right panel). (F) Representative images of cell migration in HUVECs treated with CM from PELP1-overexpressing CRC cells transfected with siRNA negative control (NC) or VEGFA siRNA (left panel). Scale bar: 200  $\mu$ m. Histograms with the fold change in the length of tube-like formation formed by the indicated cells (right panel). Data are shown as the means of three independent experiments or representative data. Error bars indicate SD.  $*p < 0.05$ ,  $**p < 0.01$ ,  $***p < 0.001$  by Student's t-test.

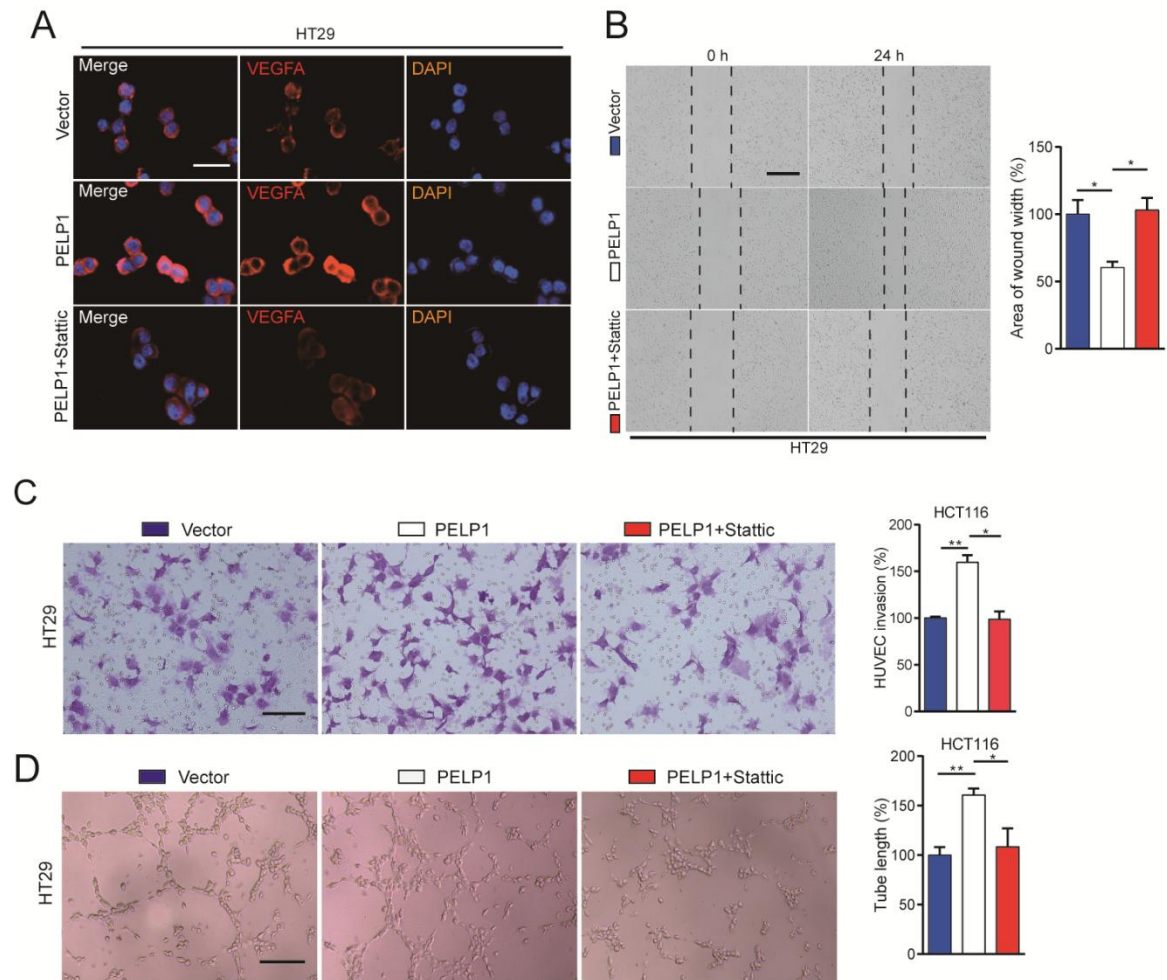

Figure S6. PELP1 promotes angiogenesis via STAT3/VEGFA axis in vitro. (A) Representative images of immunofluorescence for VEGFA in HT29-PELP1 CRC cells treated with or without Stattic. Scale bar: 30  $\mu$ m. (B) Representative images of wound healing in HUVECs treated with CM from HT29-PELP1 cells treated with or without Stattic (left panel). Scale bar: 200  $\mu$ m. Histograms with the fold change in wound closure formed by the indicated cells (right panel). (C) Representative images of cell invasion in HUVECs treated with CM from HT29-PELP1 cells treated with or without Stattic (left panel). Scale bar: 200  $\mu$ m. Histograms with the fold change in the number of invaded cells formed by the indicated cells (right panel). (D) Representative images of tube formation in HUVECs treated with CM from HT29-PELP1 CRC cells treated with or without Stattic (left panel). Scale bar: 200  $\mu$ m.

Histograms with the fold change in the length of tube-like formation formed by the indicated cells (right panel). Data are shown as the means of three independent experiments or representative data. Error bars indicate SD. \* $p < 0.05$ , \*\* $p < 0.01$ , \*\*\* $p < 0.001$  by Student's t-test.

# Densitometry readings/intensity ratio of each band of total blot

Figure. 3

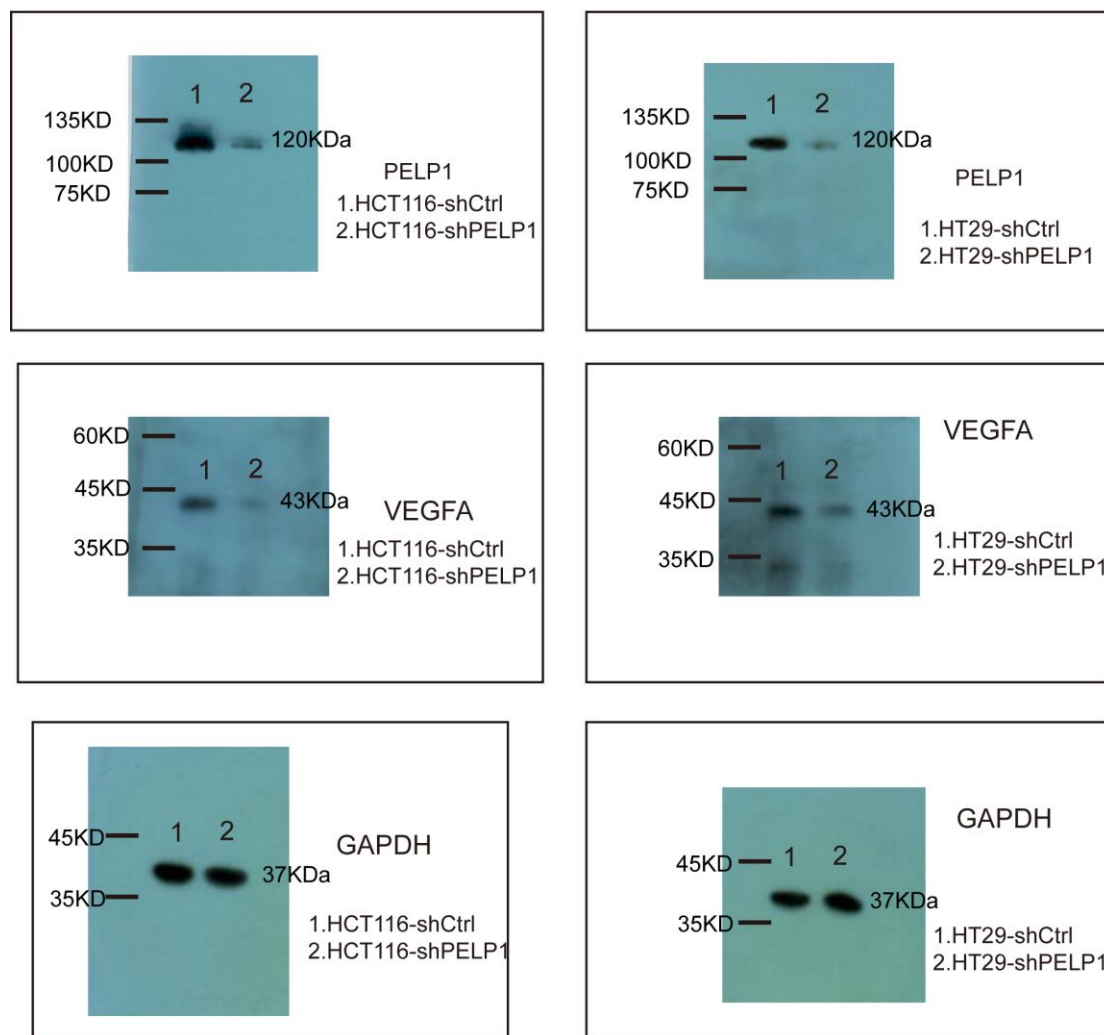

Figure S7

Figure 3 CRC cells GAPDH loading control

|               | PELP1  | GAPDH  |
|---------------|--------|--------|
| HCT116-Vector | 537325 | 601795 |
| HCT116-PELP1  | 818556 | 580956 |
| HT29-Vector   | 564462 | 427336 |
| HT29-PELP1    | 755344 | 405240 |

Ration on loading control

| HCT116-Vector                 | HCT116-PELP1 | HT29-Vector | HT29-PELP1  |
|-------------------------------|--------------|-------------|-------------|
| 0.892870496                   | 1.408981059  | 1.320885673 | 1.863942355 |
| HCT116-Vector mean            |              | 0.892870496 |             |
| Relative Unit on control mean |              |             |             |
| 1                             | 1.578035     | 1.47937     | 2.087584    |

Figure 4A

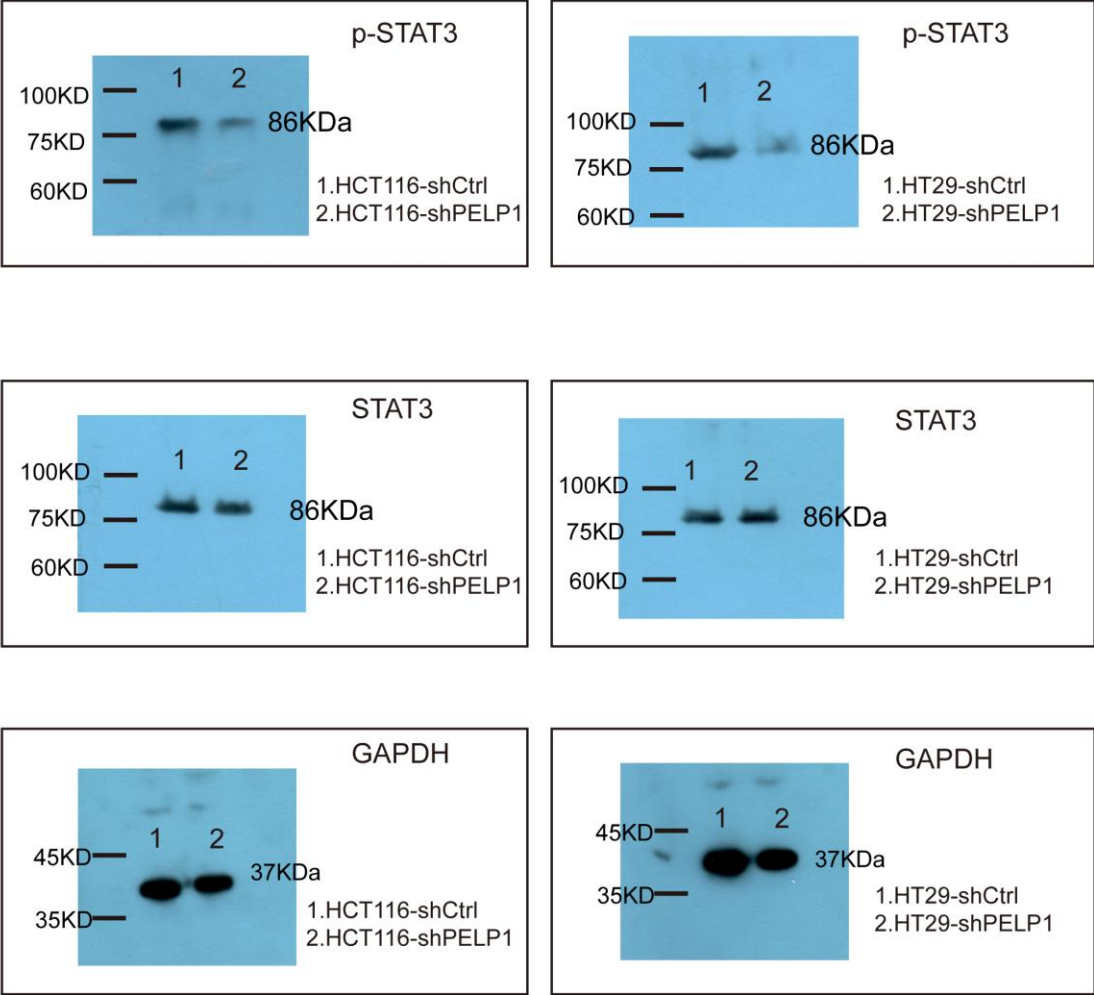

Figure S8

Figure 4A CRC cells GAPDH loading control

|                | P-STAT3 | GAPDH  |             |
|----------------|---------|--------|-------------|
| HCT116-shCtrl  | 585575  | 684620 | 0.855328503 |
| HCT116-shPELP1 | 100477  | 719028 | 0.139740038 |
| HT29-shCtrl    | 542239  | 629611 | 0.8612286   |
| HT29-shPELP1   | 131942  | 651488 | 0.202524068 |

| Ration on loading control |                |             |              |
|---------------------------|----------------|-------------|--------------|
| HCT116-shCtrl             | HCT116-shPELP1 | HT29-shCtrl | HT29-shPELP1 |
| 0.855328503               | 0.139740038    | 0.8612286   | 0.202524068  |
| HCT116-shCtrl mean        |                | 0.855328503 |              |

| Relative Unit on control |                |             |              |
|--------------------------|----------------|-------------|--------------|
| HCT116-shCtrl            | HCT116-shPELP1 | HT29-shCtrl | HT29-shPELP1 |
| 1                        | 0.163376       | 1.006898    | 0.236779     |

|                | STAT3  | GAPDH  |             |
|----------------|--------|--------|-------------|
| HCT116-shCtrl  | 611062 | 684620 | 0.892556455 |
| HCT116-shPELP1 | 609589 | 719028 | 0.847795913 |
| HT29-shCtrl    | 686923 | 629611 | 1.091027635 |
| HT29-shPELP1   | 673923 | 651488 | 1.034436551 |

| Ration on loading control |                |             |              |
|---------------------------|----------------|-------------|--------------|
| HCT116-shCtrl             | HCT116-shPELP1 | HT29-shCtrl | HT29-shPELP1 |
| 0.892556455               | 0.847795913    | 1.091027635 | 1.034436551  |
| HCT116-shCtrl mean        |                | 0.892556455 |              |

| Relative Unit on control |                |             |              |
|--------------------------|----------------|-------------|--------------|
| HCT116-shCtrl            | HCT116-shPELP1 | HT29-shCtrl | HT29-shPELP1 |
| 1                        | 0.949851       | 1.222363    | 1.158959     |

Figure 4C

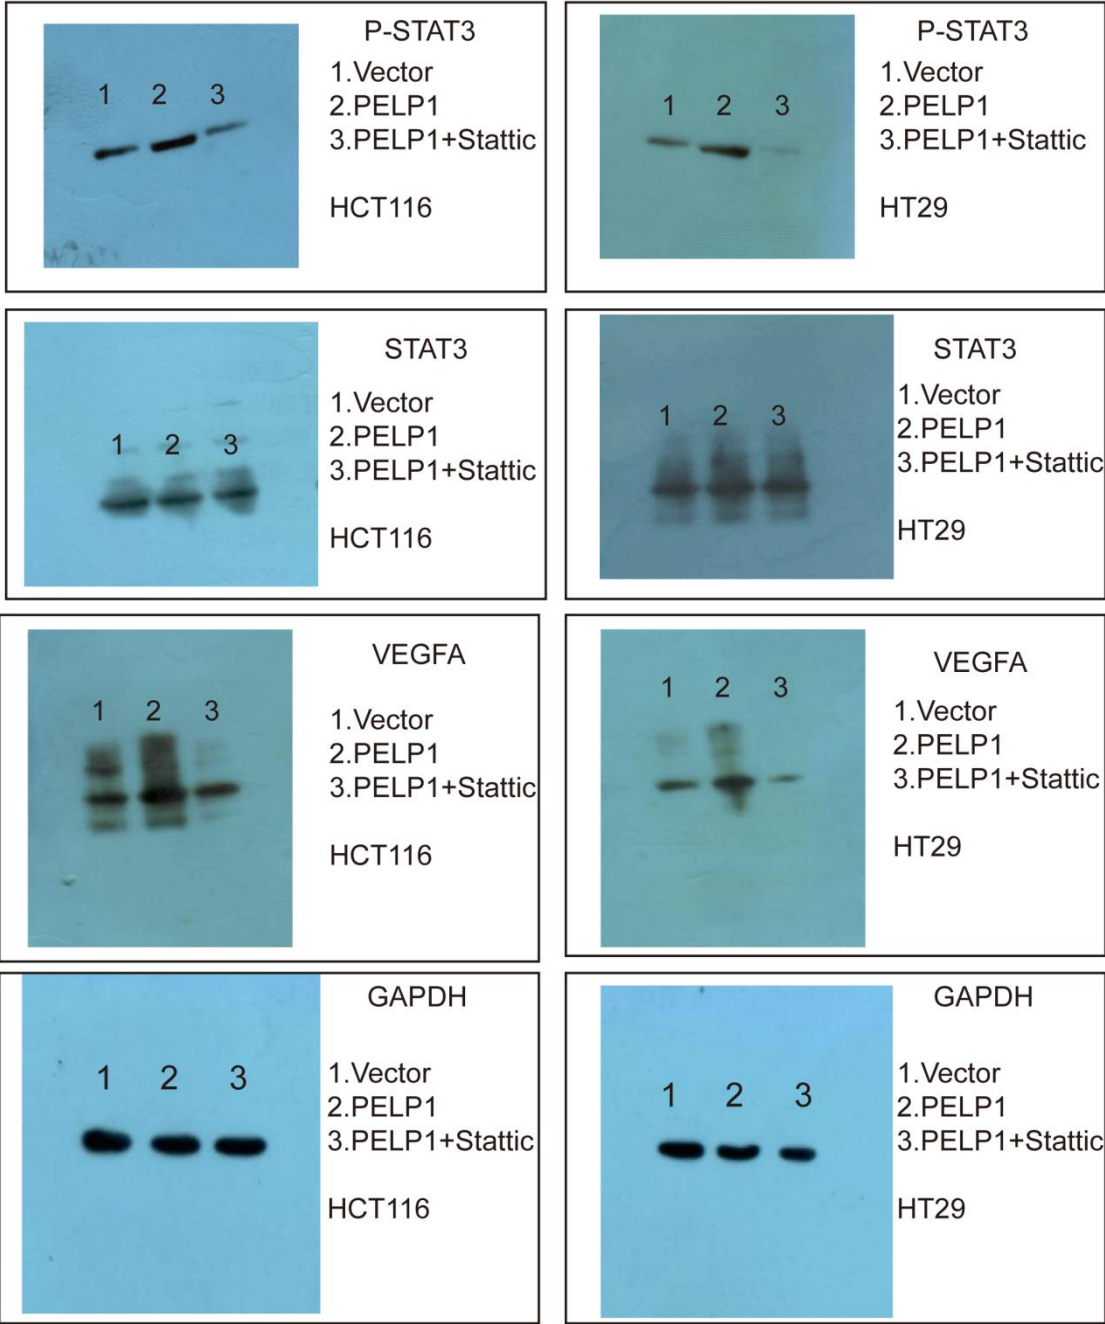

Figure S9

Figure 4C CRC cells GAPDH loading control

|               | p-STAT3 | GAPDH  |
|---------------|---------|--------|
| HCT116-Vector | 437125  | 655700 |
| HCT116-PELP1  | 701251  | 638493 |

|                      |        |        |
|----------------------|--------|--------|
| HCT116-PELP1+Stattic | 263473 | 622217 |
| HT29-Vector          | 266668 | 478213 |
| HT29-PELP1           | 464788 | 471733 |
| HT29-PELP1+Stattic   | 121381 | 493048 |

#### Ration on loading control

| HCT116-V<br>ector | HCT116-P<br>ELP1 | HCT116-PELP1+<br>Stattic | HT29-Ve<br>ctor | HT29-PE<br>LP1 | HT29-PELP1<br>+Stattic |
|-------------------|------------------|--------------------------|-----------------|----------------|------------------------|
| 0.666653958       | 1.09829081       | 0.423442304              | 0.5576343       | 0.9852776      | 0.246184956            |

HCT116-shCtrl mean 0.666653958

#### Relative Unit on control

| HCT116-V<br>ector | HCT116-P<br>ELP1 | HCT116-PELP1+<br>Stattic | HT29-Ve<br>ctor | HT29-PE<br>LP1 | HT29-PELP1<br>+Stattic |
|-------------------|------------------|--------------------------|-----------------|----------------|------------------------|
| 1                 | 1.647468         | 0.635176                 | 0.836467        | 1.477945       | 0.369284               |

|                      | STAT3  | GAPDH  |
|----------------------|--------|--------|
| HCT116-Vector        | 696842 | 655700 |
| HCT116-PELP1         | 701251 | 638493 |
| HCT116-PELP1+Stattic | 716934 | 622217 |
| HT29-Vector          | 475935 | 478213 |
| HT29-PELP1           | 464788 | 471733 |
| HT29-PELP1+Stattic   | 465592 | 493048 |

#### Ration on loading control

| HCT116-V           | HCT116-P   | HCT116-PELP1+ | HT29-Ve     | HT29-PE  | HT29-PELP1+ |
|--------------------|------------|---------------|-------------|----------|-------------|
| ector              | ELP1       | Stattic       | ctor        | LP1      | Stattic     |
| 1.062745158        | 1.09829081 | 1.152225028   | 0.995236    | 0.985277 | 0.944313738 |
| HCT116-shCtrl mean |            |               | 1.062745158 |          |             |

#### Relative Unit on control

| HCT116-V | HCT116-P | HCT116-PELP1+ | HT29-Ve  | HT29-PE  | HT29-PELP1+ |
|----------|----------|---------------|----------|----------|-------------|
| ector    | ELP1     | Stattic       | ctor     | LP1      | Stattic     |
| 1        | 1.033447 | 1.084197      | 0.936477 | 0.927106 | 0.888561    |

|                      | VEGFA  | GAPDH  |
|----------------------|--------|--------|
| HCT116-Vector        | 380740 | 655700 |
| HCT116-PELP1         | 664250 | 638493 |
| HCT116-PELP1+Stattic | 308280 | 622217 |

|                    |        |        |
|--------------------|--------|--------|
| HT29-Vector        | 251900 | 478213 |
| HT29-PELP1         | 554030 | 471733 |
| HT29-PELP1+Stattic | 188620 | 493048 |

Ration on loading control

| HCT116-V           | HCT116-P   | HCT116-PELP1+ | HT29-Ve     | HT29-PE   | HT29-PELP1+ |
|--------------------|------------|---------------|-------------|-----------|-------------|
| ector              | ELP1       | Stattic       | ctor        | LP1       | Stattic     |
| 0.580661888        | 1.04034030 | 0.495454158   | 0.5267527   | 1.1744567 | 0.382559102 |
| HCT116-shCtrl mean |            |               | 0.580661888 |           |             |

Relative Unit on control

| HCT116-V | HCT116-P | HCT116-PELP1+ | HT29-Ve  | HT29-PE  | HT29-PELP1+ |
|----------|----------|---------------|----------|----------|-------------|
| ector    | ELP1     | Stattic       | ctor     | LP1      | Stattic     |
| 1        | 1.791646 | 0.853258      | 0.907159 | 2.022617 | 0.658833    |

Figure 5

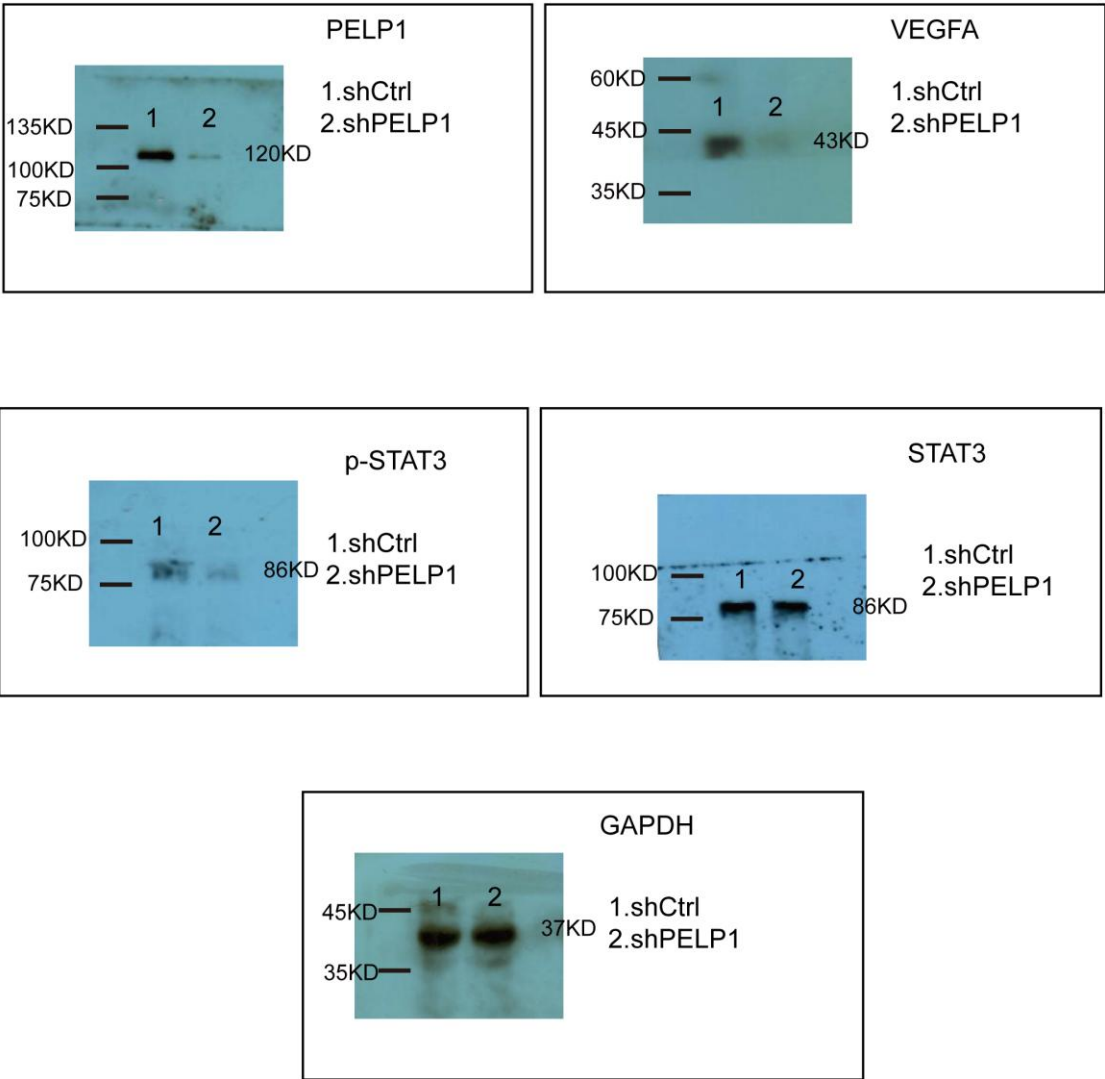

Figure S10

Figure 5 CRC cells GAPDH loading control

|                           | VEGFA          | GAPDH  |
|---------------------------|----------------|--------|
| HCT116-shCtrl             | 288635         | 385212 |
| HCT116-shPELP1            | 47346          | 380897 |
| Ration on loading control |                |        |
| HCT116-shCtrl             | HCT116-shPELP1 |        |

|                          |                |            |
|--------------------------|----------------|------------|
|                          | 0.749288703    | 0.12430132 |
| HCT116-shCtrl mean       | 0.749288703    |            |
| Relative Unit on control |                |            |
| HCT116-shCtrl            | HCT116-shPELP1 |            |
|                          | 1              | 0.165892   |
| p-STAT3                  |                |            |
| HCT116-shCtrl            | 321647         | 385212     |
| HCT116-shPELP1           | 79959          | 380897     |

|                           |                |             |
|---------------------------|----------------|-------------|
| Ration on loading control |                |             |
| HCT116-shCtrl             | HCT116-shPELP1 |             |
|                           | 0.834986968    | 0.209922893 |
| HCT116-shCtrl mean        | 0.834986968    |             |

|                          |                |          |
|--------------------------|----------------|----------|
| Relative Unit on control |                |          |
| HCT116-shCtrl            | HCT116-shPELP1 |          |
|                          | 1              | 0.251409 |
| STAT3                    |                |          |
| HCT116-shCtrl            | 589015         | 385212   |
| HCT116-shPELP1           | 605874         | 380897   |

|                           |                |  |
|---------------------------|----------------|--|
| Ration on loading control |                |  |
| HCT116-shCtrl             | HCT116-shPELP1 |  |

1.529067111

1.590650491

HCT116-shCtrl mean

1.529067111

Relative Unit on control

HCT116-shCtrl

HCT116-shPELP1

1

1.040275

Figure S2A

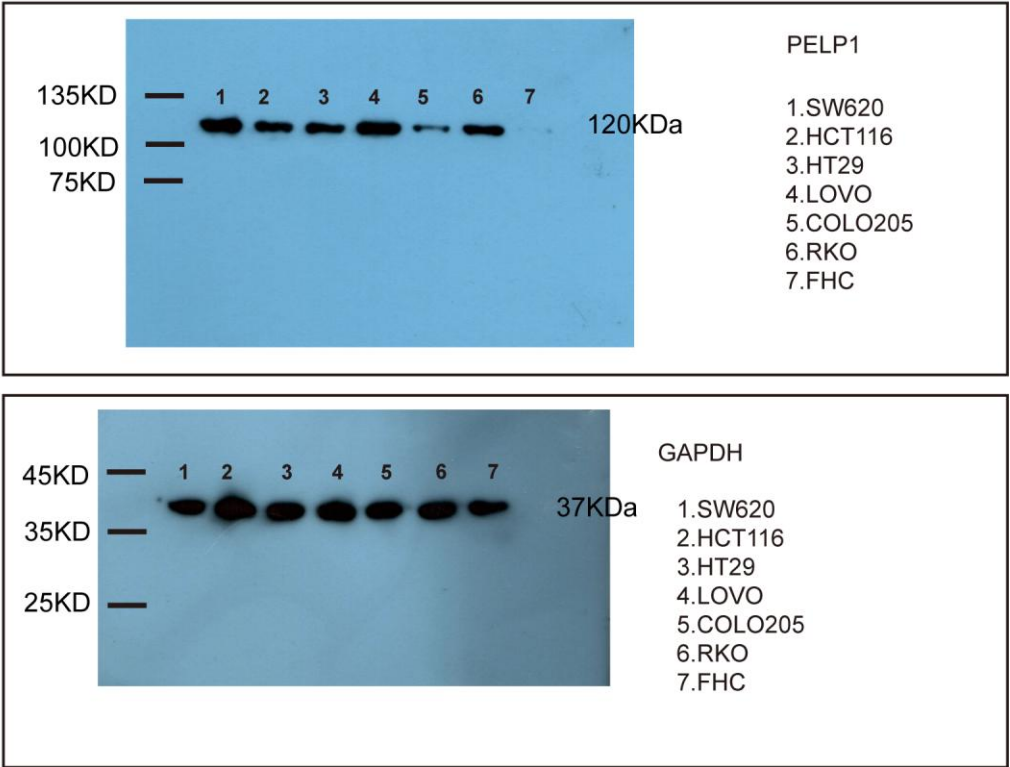

Figure S11

Figure S2A CRC cells GAPDH loading control

|                                 | PELP1       | GAPDH       |             |             |             |             |             |
|---------------------------------|-------------|-------------|-------------|-------------|-------------|-------------|-------------|
| SW620                           | 1065298     | 640401      |             |             |             |             |             |
| HCT116                          | 665102      | 638276      |             |             |             |             |             |
| HT29                            | 668618      | 592436      |             |             |             |             |             |
| LOVO                            | 1066366     | 626363      |             |             |             |             |             |
| COLO205                         | 224449      | 652720      |             |             |             |             |             |
| RKO                             | 655692      | 625395      |             |             |             |             |             |
| FHC                             | 7127        | 607894      |             |             |             |             |             |
| Ration on<br>loading<br>control | SW620       | HCT116      | HT29        | LOVO        | COLO205     | RKO         | FHC         |
|                                 | 1.663485847 | 1.04202884  | 1.128591105 | 1.702472847 | 0.343867202 | 1.048444583 | 0.011724083 |
| SW620 mean                      |             | 1.663485847 |             |             |             |             |             |
| Relative                        | SW620       | HCT116      | HT29        | LOVO        | COLO205     | RKO         | FHC         |
| Unit on<br>control              | 1           | 0.626413    | 0.678449    | 1.023437    | 0.206715    | 0.63027     | 0.007048    |

Figure S2B

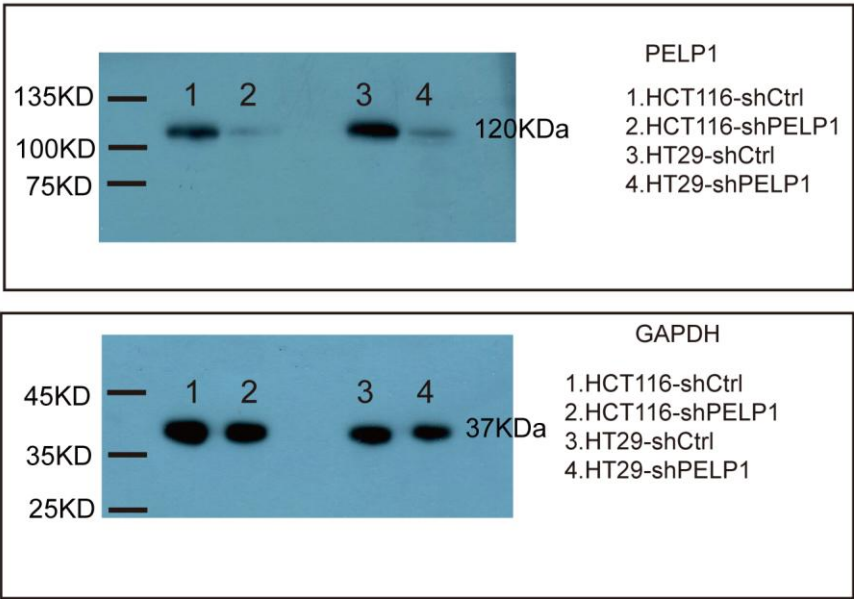

Figure S12

Fiugre S2B CRC cells GAPDH loading control

|                               | PELP1          | GAPDH       |              |
|-------------------------------|----------------|-------------|--------------|
| HCT116-shCtrl                 | 593860         | 793883      |              |
| HCT116-shPELP1                | 38630          | 824244      |              |
| HT29-shCtrl                   | 741506         | 832120      |              |
| HT29-shPELP1                  | 105435         | 755960      |              |
| Ration on loading control     |                |             |              |
| HCT116-shCtrl                 | HCT116-shPELP1 | HT29-shCtrl | HT29-shPELP1 |
| 0.748044737                   | 0.04686719     | 0.891104648 | 0.139471665  |
| HCT116-shCtrl mean            |                | 0.748044737 |              |
| Relative Unit on control mean |                |             |              |
| HCT116-shCtrl                 | HCT116-shPELP1 | HT29-shCtrl | HT29-shPELP1 |

|   |          |          |          |
|---|----------|----------|----------|
| 1 | 0.062653 | 1.191245 | 0.186448 |
|---|----------|----------|----------|

Fiugre S3A

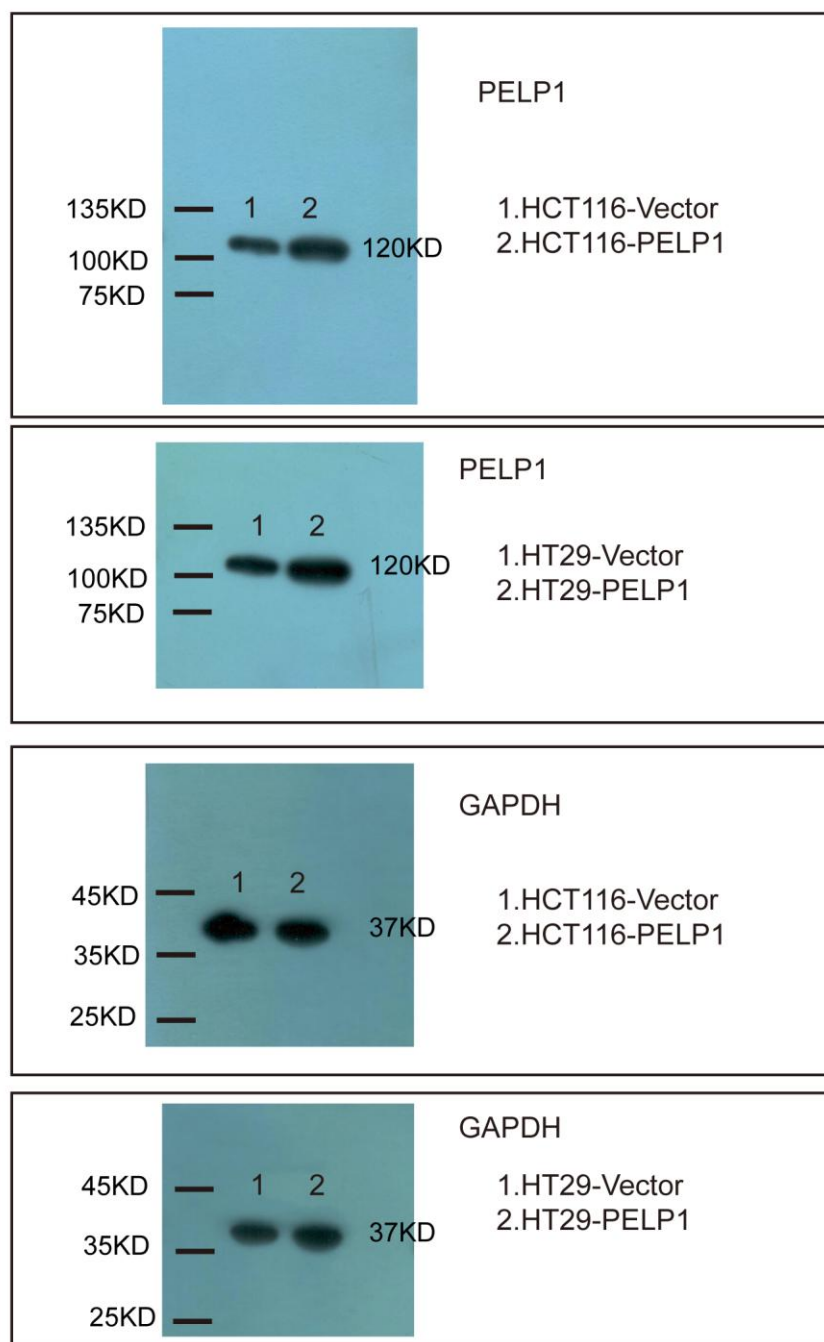

Figure S13

Figure S3A CRC cells GAPDH loading control

|               | PELP1  | GAPDH  |
|---------------|--------|--------|
| HCT116-Vector | 537325 | 601795 |
| HCT116-PELP1  | 818556 | 580956 |

|             |        |        |
|-------------|--------|--------|
| HT29-Vector | 564462 | 427336 |
| HT29-PELP1  | 755344 | 405240 |

**Ration on loading control**

| HCT116-Vector      | HCT116-PELP1 | HT29-Vector | HT29-PELP1  |
|--------------------|--------------|-------------|-------------|
| 0.892870496        | 1.408981059  | 1.320885673 | 1.863942355 |
| HCT116-Vector mean |              | 0.892870496 |             |

**Relative Unit on control mean**

|   |          |         |          |
|---|----------|---------|----------|
| 1 | 1.578035 | 1.47937 | 2.087584 |
|---|----------|---------|----------|

Fiugre S4C

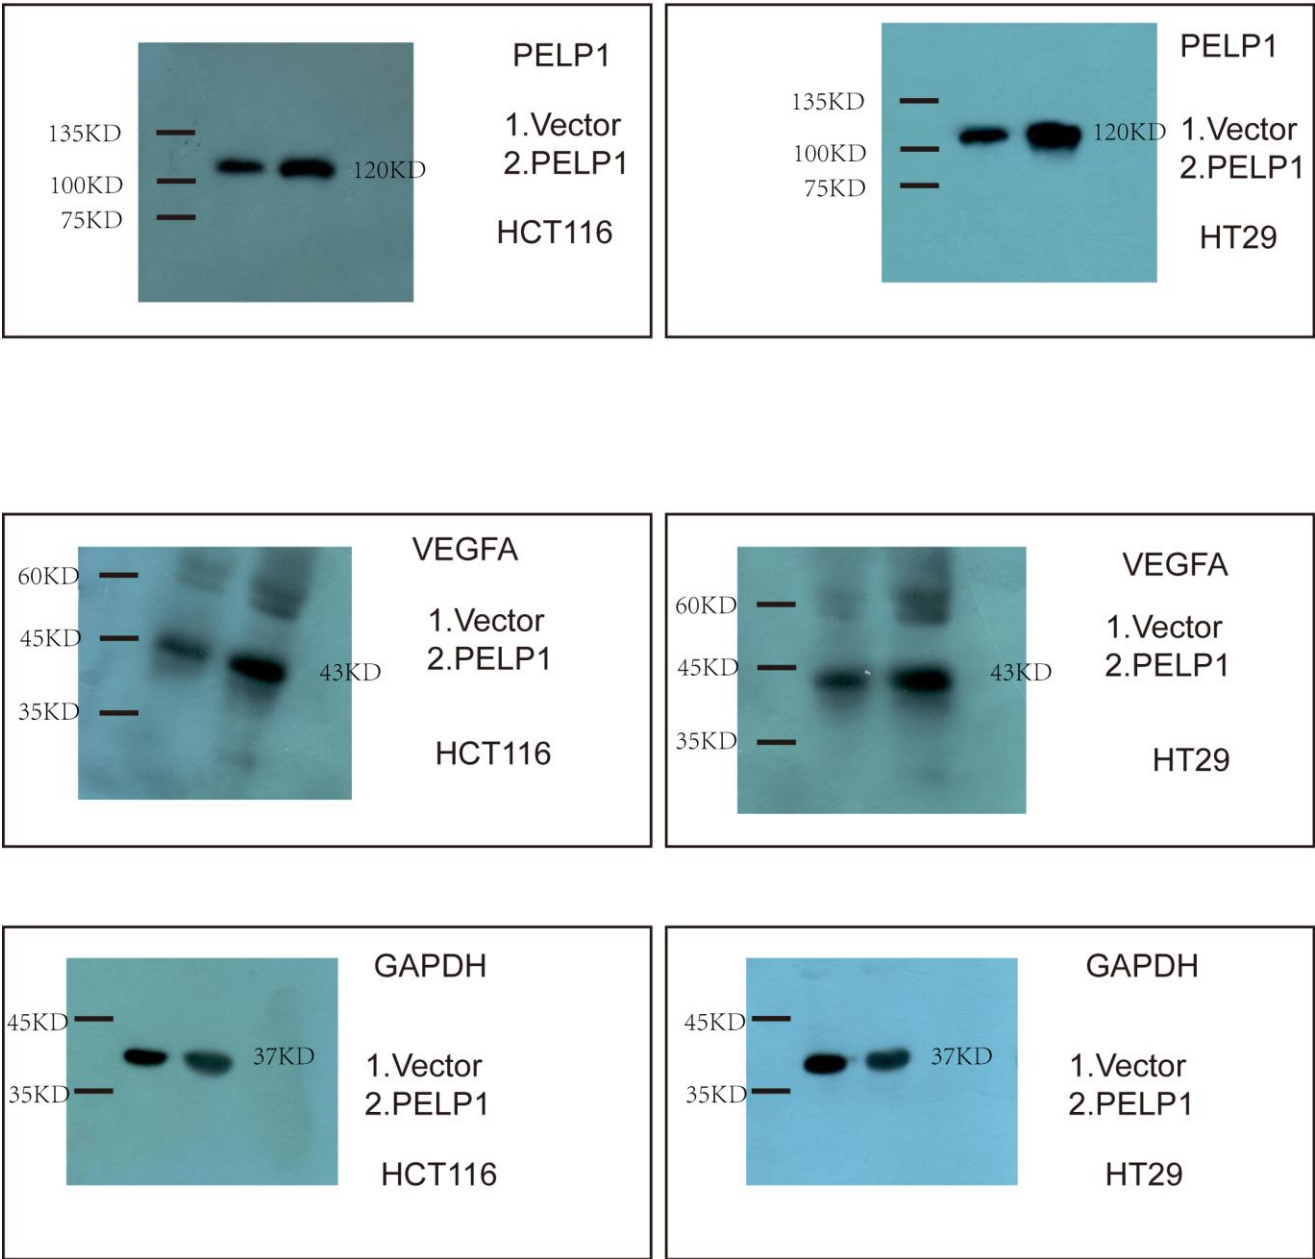

Figure S14

Figure S4C CRC cells GAPDH loading control

|               | PELP1  | GAPDH  |             |
|---------------|--------|--------|-------------|
| HCT116-Vector | 359502 | 414325 | 1.045763591 |
| HCT116-PELP1  | 522996 | 468304 | 0.422970976 |

|                           |              |             |             |
|---------------------------|--------------|-------------|-------------|
| HT29-Vector               | 577792       | 615900      | 0.670214321 |
| HT29-PELP1                | 724212       | 594358      | 0.315552243 |
| Ration on loading control |              |             |             |
| HCT116-Vector             | HCT116-PELP1 | HT29-Vector | HT29-PELP1  |
| 1.045763591               | 0.422970976  | 0.670214321 | 0.315552243 |
| HCT116-shCtrl mean        | 1.045763591  |             |             |
| Relative Unit on control  |              |             |             |
| HCT116-Vector             | HCT116-PELP1 | HT29-Vector | HT29-PELP1  |
| 1                         | 0.404461     | 0.640885    | 0.301743    |
| VEGFA                     |              | GAPDH       |             |
| HCT116-Vector             | 157986       | 414325      | 0.381309359 |
| HCT116-PELP1              | 341720       | 468304      | 0.729696949 |
| HT29-Vector               | 161679       | 615900      | 0.262508524 |
| HT29-PELP1                | 318165       | 594358      | 0.535308686 |
| Ration on loading control |              |             |             |
| HCT116-Vector             | HCT116-PELP1 | HT29-Vector | HT29-PELP1  |
| 0.381309359               | 0.729696949  | 0.262508524 | 0.535308686 |
| HCT116-shCtrl mean        | 0.381309359  |             |             |
| Relative Unit on control  |              |             |             |
| HCT116-Vector             | HCT116-PELP1 | HT29-Vector | HT29-PELP1  |
| 1                         | 1.913661     | 0.68844     | 1.40387     |

Figure S5

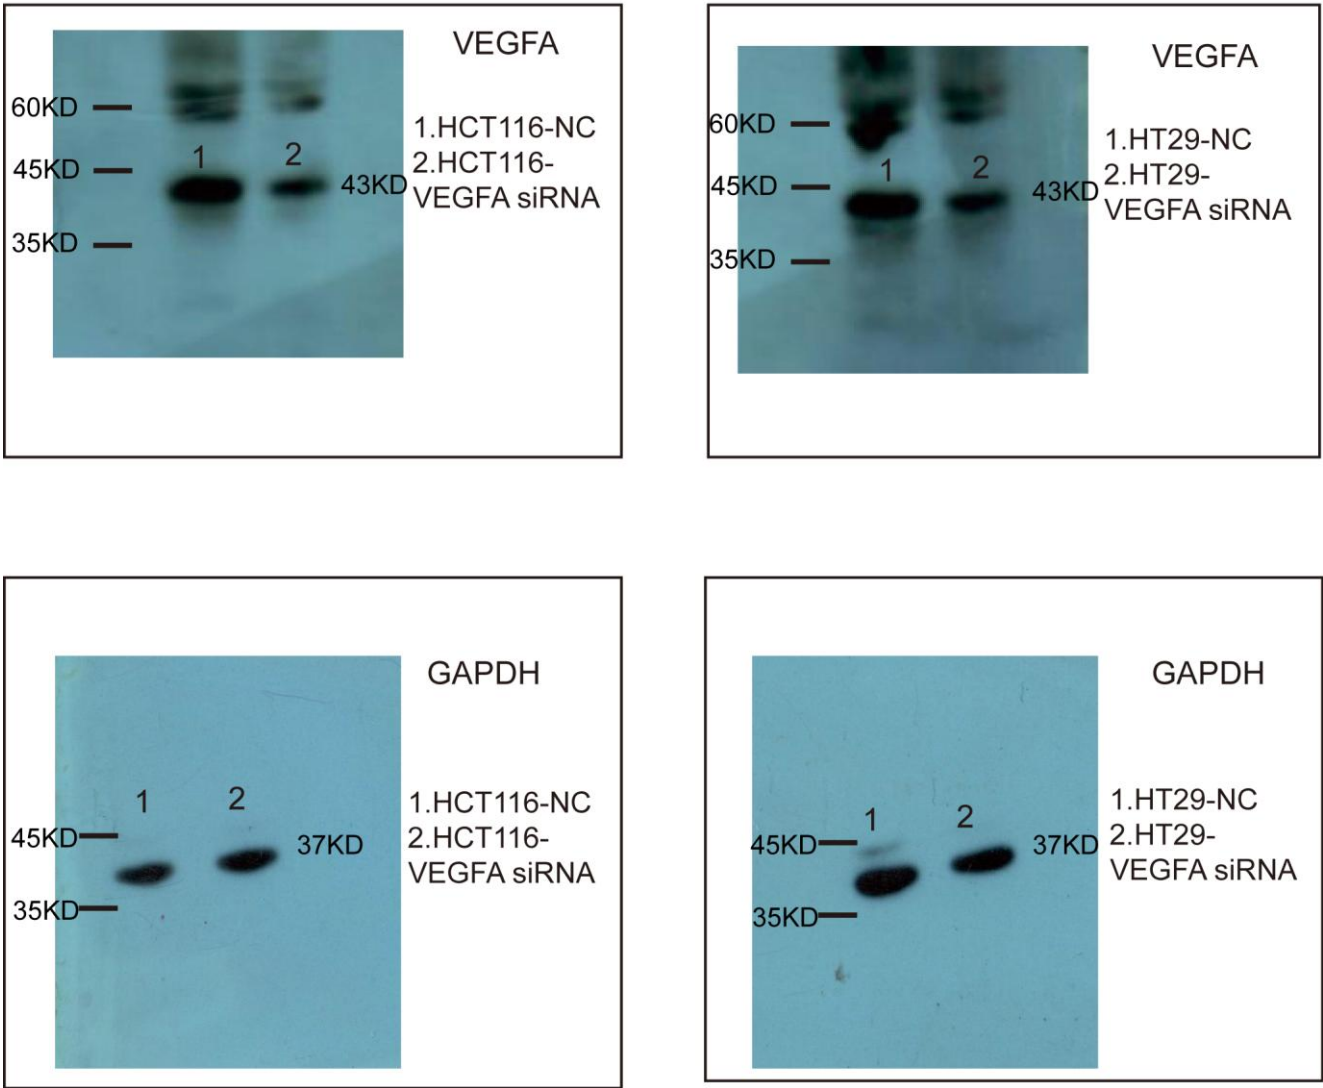

Figure S15

Figure S5 CRC cells GAPDH loading control

|                    | VEGFA  | GAPDH  |             |
|--------------------|--------|--------|-------------|
| HCT116-NC          | 433286 | 414325 | 1.045763591 |
| HCT116-VEGFA siRNA | 198079 | 468304 | 0.422970976 |
| HT29-NC            | 412785 | 615900 | 0.670214321 |
| HT29-VEGFA siRNA   | 187551 | 594358 | 0.315552243 |

**Ration on loading control**

| HCT116-shCtrl      | HCT116-shPELP1 | HT29-shCtrl | HT29-shPELP1 |
|--------------------|----------------|-------------|--------------|
| 1.045763591        | 0.422970976    | 0.670214321 | 0.315552243  |
| HCT116-shCtrl mean |                | 1.045763591 |              |

**Relative Unit on control**

| HCT116-shCtrl | HCT116-shPELP1 | HT29-shCtrl | HT29-shPELP1 |
|---------------|----------------|-------------|--------------|
| 1             | 0.404461       | 0.640885    | 0.301743     |
